# Supplementary material
Source: publisher site journal article supplement (https://www.dovepress.com/article/219850)
Supplement: Supplementary file 1 [file get_supplementary_file.php]

*Supplementary Material*

**Simultaneous Detection of Eleven Sexually Transmitted Agents Using  
Multiplexed PCR Coupled with MALDI-TOF Analysis**

Leshan Xiu<sup>1</sup>, Chi Zhang<sup>1</sup>, Yamei Li<sup>1</sup>, Feng Wang<sup>2</sup>, Junping Peng<sup>1\*</sup>

<sup>1</sup>NHC Key Laboratory of Systems Biology of Pathogens, Institute of Pathogen Biology, Chinese Academy of Medical Sciences & Peking Union Medical College, Beijing, China; <sup>2</sup>Shenzhen Center for Chronic Disease Control, Shenzhen, China

\*corresponding author: Junping Peng

Tel: 86-10- 67878493

Fax: 86-10- 67878493

E-mail: pengjp@hotmail.com

Mailing address: No. 6 Rongjing Eastern Street, BDA, Beijing 100176, China.

## Supplementary information

Table S1 Target gene and sequences of amplification primers and extension probes used in the STI-MS method

Table S2 Primers and probes of real-time PCR used in this study

Table S3 Primers of nested PCR used in this study

Table S4 Discordant results verified by arbitration testing

Table S5 Multiple infections verified by confirmatory tests and arbitration testing

Fig S1 Analytical specificity of Herpes simplex virus types 1 by using STI-MS assay

Fig S2 Analytical specificity of Herpes simplex virus types 2 by using STI-MS assay

Fig S3 Analytical specificity of *Chlamydia trachomatis* by using STI-MS assay

Fig S4 Analytical specificity of *Treponema pallidum* by using STI-MS assay

Fig S5 Analytical specificity of *Neisseria gonorrhoeae* by using STI-MS assay

Fig S6 Analytical specificity of *Trichomonas vaginalis* by using STI-MS assay

Fig S7 Analytical specificity of *Mycoplasma hominis* by using STI-MS assay

Fig S8 Analytical specificity of *Ureaplasma urealyticum* by using STI-MS assay

Fig S9 Analytical specificity of *Mycoplasma genitalium* by using STI-MS assay

Fig S10 Analytical specificity of *Ureaplasma parvum* by using STI-MS assay

Fig S11 Analytical specificity of *Haemophilus ducreyi* by using STI-MS assay

Fig S12 Discrepant results of *Chlamydia trachomatis* verified by Digital PCR

Fig S13 Discrepant results of *Mycoplasma genitalium* verified by Digital PCR

Fig S14 Discrepant results of *Mycoplasma hominis* verified by Digital PCR

Fig S15 Discrepant results of *Neisseria gonorrhoeae* verified by Digital PCR

Fig S16 Discrepant results of Herpes simplex virus types 1 verified by Digital PCR

Fig S17 Discrepant results of Herpes simplex virus types 2 verified by Digital PCR

Fig S18 Discrepant results of *Ureaplasma urealyticum* verified by Digital PCR

Table S1 | Target gene and sequences of amplification primers and extension probes used in the STI-MS method

| Target pathogen              | Target              | Oligonucleotide                                                                                                               |
|------------------------------|---------------------|-------------------------------------------------------------------------------------------------------------------------------|
| Herpes simplex virus types 1 | <i>gD</i>           | Forward: ACGTTGGATGCTGCCGGCTCGTGAAGATAAA<br>Reverse: ACGTTGGATGCGTACTTACAGGAGCCCTTG<br>Extension probe: ATAAACGACTGGACGG      |
|                              | <i>gG</i>           | Forward: ACGTTGGATGCGTGCCGTTGTTCCCATAT<br>Reverse: ACGTTGGATGTGGTGGAGGAGACGTTGGTG<br>Extension probe: CGTTTCTTGTCGGTGTATCG    |
| Herpes simplex virus types 2 | <i>gD</i>           | Forward: ACGTTGGATGCAGCTTAAAAATCGCCGGGT<br>Reverse: ACGTTGGATGTTCCGGAACGAGTTCGGGT<br>Extension probe: GACACCACCAACGC          |
|                              | <i>gG</i>           | Forward: ACGTTGGATGGTCGTCCGTCACGAGCCCC<br>Reverse: ACGTTGGATGTTGCGTTGGGTGCGCAAAT<br>Extension probe: CGCTCGTTCCTCACGG         |
| <i>Chlamydia trachomatis</i> | cryptic plasmid     | Forward: ACGTTGGATGTTTCTTCAGCGCTACACACG<br>Reverse: ACGTTGGATGTGACAAGCTTAGATCCGTTT<br>Extension probe: TCACACGCTCAAATCATC     |
|                              | <i>omp1</i>         | Forward: ACGTTGGATGGTTTCGGCGGAGATCCTTG<br>Reverse: ACGTTGGATGCACGGTCGAAAACAAAGTCA<br>Extension probe: ACTTGGTGTGACGC          |
| <i>Treponema pallidum</i>    | <i>polA</i>         | Forward: ACGTTGGATGACGTCCGGAACAATAAGAGG<br>Reverse: ACGTTGGATGTGAAACGGATGGATTGCAT<br>Extension probe: TGCTTCCTGAAAGCAGAT      |
|                              | <i>tpp47</i>        | Forward: ACGTTGGATGCAGGCTGACTTTGATTGCGA<br>Reverse: ACGTTGGATGCAGCATCCATCAGAGTCTCC<br>Extension probe: GCCTTCCCAAGTACGA       |
| <i>Neisseria gonorrhoeae</i> | <i>opa</i>          | Forward: ACGTTGGATGTATATCGGTGTGCGTGTCCG<br>Reverse: ACGTTGGATGGCGGTAAGAGTATTTTTTCGT<br>Extension probe: TCAGACACGGTATCGAT     |
|                              | <i>porA</i>         | Forward: ACGTTGGATGCGTGCCGTTTGAAAATACCC<br>Reverse: ACGTTGGATGGTTTGACGATGCCAGCAAAG<br>Extension probe: TCGTTTGAAAATACCCAATTGC |
| <i>Trichomonas vaginalis</i> | <i>beta-tubulin</i> | Forward: ACGTTGGATGTTCCGTACTCAAGCTCAC<br>Reverse: ACGTTGGATGGCCGGACATAACCATGGAAA<br>Extension probe: CCTCACAACCAACATA         |
|                              |                     | Forward: ACGTTGGATGCACTCAAGGTCAAAGTGGCT                                                                                       |

|                               |                            |                                                                                                                                   |
|-------------------------------|----------------------------|-----------------------------------------------------------------------------------------------------------------------------------|
|                               | <i>repeated DNA target</i> | Reverse: ACGTTGGATGCTTTGCGAACTGAGGGTAAG<br>Extension probe: CCTTAGTAACACATTAACCTAT                                                |
| <i>Mycoplasma hominis</i>     | <i>gap</i>                 | Forward: ACGTTGGATGCAGGCGCTTCATGTACTACT<br>Reverse: ACGTTGGATGTGGTCTGCTGTATATGAGTG<br>Extension probe: CCTGTTAGCTCCTATTGC         |
|                               | <i>YidC</i>                | Forward: ACGTTGGATGTAGCTCTTGTCCAGAACCGA<br>Reverse: ACGTTGGATGTATTATTTTTGGCTATCGG<br>Extension probe: ATTTTACAGTAAATGATTGTACACAAC |
| <i>Ureaplasma urealyticum</i> | <i>ureA</i>                | Forward: ACGTTGGATGTACCAACCATTGTATCTACA<br>Reverse: ACGTTGGATGGACTTAATGCAATCTGCTCG<br>Extension probe: CCATAACTTGATCAACACGTAA     |
|                               | <i>ureC</i>                | Forward: ACGTTGGATGAAAGGACGTACAATCCACGC<br>Reverse: ACGTTGGATGTATCTGGAGCATGTCCACCA<br>Extension probe: TACGCTTACCATACAGAAG        |
| <i>Mycoplasma genitalium</i>  | 16S rRNA IR                | Forward: ACGTTGGATGCCCAAATCAATGTTTGGTCTC<br>Reverse: ACGTTGGATGGGAACTAGAAAGATTGTCGT<br>Extension probe: CATTGGTTCAGTTTGTATCC      |
|                               | <i>mgpB</i>                | Forward: ACGTTGGATGCCTTAACCCCTTGGACTTGA<br>Reverse: ACGTTGGATGGTTGTCATTTGGCTTCTTAC<br>Extension probe: GATTACTGGAGAGAACCCA        |
| <i>Ureaplasma parvum</i>      | <i>rpmA</i>                | Forward: ACGTTGGATGCAGGGTAGATTTTATTGCCC<br>Reverse: ACGTTGGATGGGTCGTGACTCAAATCCTAA<br>Extension probe: CTTTGACCTGCTTTAGTAGATTGC   |
|                               | <i>ureD</i>                | Forward: ACGTTGGATGTTTACAATCATGGTTCCACA<br>Reverse: ACGTTGGATGCAACCACGTAAAAATGATG<br>Extension probe: GGGTTCCACAATAATGATAGCC      |
| <i>Haemophilus ducreyi</i>    | 16S rRNA IR                | Forward: ACGTTGGATGGTAGAAAGTCTGAGTAATC<br>Reverse: ACGTTGGATGCGCGAGGCATATTGATATAC<br>Extension probe: ATAATCTAAAATCTTAGCTGAACAAA  |
|                               | <i>recD</i>                | Forward: ACGTTGGATGCGACACTTTTACACGCGCTT<br>Reverse: ACGTTGGATGTTTCTAGCGGAGTATAAGCA<br>Extension probe: GCTGAATTAGATTATCAATTCGCT   |

Table S2 | Primers and probes of real-time PCR used in this study

| Target pathogen               | Target gene         | Oligonucleotide                                                                                                         | Reference                  |
|-------------------------------|---------------------|-------------------------------------------------------------------------------------------------------------------------|----------------------------|
| Herpes simplex virus types 1  | <i>gD</i>           | Forward: GGGCCGTGATTTTGTGGTTC<br>Reverse: CCGCCAAGGCATATTTGC<br>Probe: FAM-TAGTGGGCCTCCATGGG-MGB                        | This study                 |
| Herpes simplex virus types 2  | <i>gD</i>           | Forward: ACCTGACCATCGCCTGGTATC<br>Reverse: CAGACCCCAACGACTTGT<br>Probe: FAM-TTATGGAATACACCGAGTGC-MGB                    | This study                 |
| <i>Chlamydia trachomatis</i>  | cryptic plasmid     | Forward: TCCGGAGCGAGTTACGAAGA<br>Reverse: AATCAATGCCCCGGGATTGGT<br>Probe: VIC-TGACTAATCTCCAAGCTTAA-MGB                  | Modified from <sup>1</sup> |
| <i>Treponema pallidum</i>     | <i>polA</i>         | Forward: AGGATCGCCCATATGTCCAA<br>Reverse: GTGAGCGTCTCATATTCCAAA<br>Probe: FAM-ATGCACCAGCTTCGA-MGB                       | <sup>2</sup>               |
| <i>Neisseria gonorrhoeae</i>  | <i>porA</i>         | Forward: CCGGAACTGGTTTCATCTGATT<br>Reverse: GTTTCAGCGGCAGCATTCA<br>Probe: FAM-CGTGAAAGTAGCAGGCGTATAGGCGGACTT-BHQ1       | <sup>3</sup>               |
| <i>Mycoplasma hominis</i>     | <i>YidC</i>         | Forward: CCTCAGTTTATTGCATTGCCAAT<br>Reverse: AATACCCGGTTTAGTGAGTTTGCT<br>Probe: VIC-AACAAGCAACCTGATATT-MGB              | This study                 |
| <i>Ureaplasma urealyticum</i> | <i>ureD</i>         | Forward: CATTGATGTTGCACAAGGAG<br>Reverse: CGTGATTTTAATGTATCGGCTTTC<br>Probe: VIC-TTGTCCGCCTTTACGAG-MGB                  | Modified from <sup>4</sup> |
| <i>Mycoplasma genitalium</i>  | <i>mgpB</i>         | Forward: GAGAAATACCTTGATGGTCAGCAA<br>Reverse: GTTAATATCATATAAAGCTCTACCGTTGTTATC<br>Probe: FAM-ACTTTGCAATCAGAAGGT-MGB    | <sup>5</sup>               |
| <i>Ureaplasma parvum</i>      | <i>ureD</i>         | Forward: CATTGATGTTGCACAAGGAG<br>Reverse: CGTGATTTTAATGTATCGGCTTTC<br>Probe: FAM-TTGACCACCCTTACGAG-MGB                  | <sup>4</sup>               |
| <i>Trichomonas vaginalis</i>  | repeated DNA target | Forward: CATTGACCACACGGACAAAAAG<br>Reverse: CGAAGTGCTCGAATGCGA<br>Probe: FAM-TCATTTTCGGATGGTCAAGCAGCCA-TAMRA            | <sup>6</sup>               |
| <i>Haemophilus ducreyi</i>    | 16S rRNA            | Forward: ACATCCATAGAAGAAGCTCAGAGATGA<br>Reverse: TTGAGTTCCCATCAYTACATGCT<br>Probe: FAM-GTGCCTTCGGGAAGCTATGTGACAGGT-BHQ1 | <sup>7</sup>               |

Table S3 | Primers of nested PCR used in this study

| Target Pathogen               |                 |  | Target gene | Direction                 | 1 <sup>st</sup> Primers  | 2 <sup>nd</sup> Primers | Reference |
|-------------------------------|-----------------|--|-------------|---------------------------|--------------------------|-------------------------|-----------|
| Herpes simplex virus types 1  | <i>gD</i>       |  | Forward     | TGCTCCTACAACAAGTC         | ATCCGAACGCAGCCCCGCTG     | 8                       |           |
|                               |                 |  | Reverse     | CGGTGCTCCAGGATAAA         | TCTCCGTCCAGTCGTTTATCTTC  |                         |           |
| Herpes simplex virus types 2  | <i>gG</i>       |  | Forward     | TCAGCCCATCCTCCTTCGGCAGTA  | AGACGTGCGGGTCGTACACG     | 9                       |           |
|                               |                 |  | Reverse     | GATCTGGTACTCGAATGTCTCCG   | CGCGCGGTCCCAGATCGGCA     |                         |           |
| <i>Chlamydia trachomatis</i>  | cryptic plasmid |  | Forward     | GACGCGTCGGAAATTTGGTT      | TGCGTCTGGGATTAAC TTTCTTG | This study              |           |
|                               |                 |  | Reverse     | TCTTTCAATGGAATAGCGGGT     | CATGCCGCTCTAGCCTGTTT     |                         |           |
| <i>Neisseria gonorrhoeae</i>  | <i>porA</i>     |  | Forward     | AAATCATGTTGCGGGAAAGCA     | GGGTAATTGGAGACTGATTGGGT  | This study              |           |
|                               |                 |  | Reverse     | AAGCCGATAAACGAGCCGAA      | TGCGGCTTTTGGCCTTAGTA     |                         |           |
| <i>Mycoplasma hominis</i>     | <i>YidC</i>     |  | Forward     | TCACAGATTTGGCCTCAGTTT     | GCCTCAGTTTATTGCATTGCC    | This study              |           |
|                               |                 |  | Reverse     | AGTCCGGCACTAAAGAATGCTC    | TGGCATATATTGCGATAGTGCTT  |                         |           |
| <i>Ureaplasma urealyticum</i> | <i>ureA</i>     |  | Forward     | GTAGTGGAAGGGGCAAGAGATG    | GGAAGGGGCAAGAGATGGT      | This study              |           |
|                               |                 |  | Reverse     | GCCTTCAGCGAAGTTAATTGCTCC  | TGGTACTAATTTACCTGGAGTGAA |                         |           |
| <i>Mycoplasma genitalium</i>  | 16S rRNA        |  | Forward     | TACATGCAAGTCGATCGGAAGTAGC | TTTAGAGGCGAACGGGTGAG     | Modified from<br>10     |           |
|                               |                 |  | Reverse     | AAACTCCAGCCATTGCCTGCTAG   | CCTTGGTAGGCCATTACCCT     |                         |           |

Table S4 | Discordant results verified by arbitration testing

| Sample ID | STI-MS results <sup>a</sup> | Confirmed tests results | Arbitration testing results |
|-----------|-----------------------------|-------------------------|-----------------------------|
| M1        | CT, MG, NG                  | MG, NG                  | CT, MG, NG                  |
| M2        | CT                          | Negative                | CT                          |
| M3        | UU, CT                      | UU                      | UU, CT                      |
| M4        | UU, CT, HSV1                | UU                      | UU, CT, HSV1                |
| M5        | UU, CT                      | UU                      | UU, CT                      |
| M6        | UU, CT, MH                  | UU, MH                  | UU, CT, MH                  |
| M7        | UU, CT, MG, NG              | UU, CT, NG              | UU, CT, MG, NG              |
| M8        | MG                          | Negative                | MG                          |
| M9        | UU, MG                      | Negative                | UU, MG                      |
| M10       | MG                          | Negative                | MG                          |
| M11       | CT, MG, MH, NG              | CT, MH, NG              | CT, MG, MH, NG              |
| M12       | MG, HSV1, HSV2              | HSV1, HSV2              | MG, HSV1, HSV2              |
| M13       | UU, MH                      | UU                      | UU, MH                      |
| M14       | MH                          | Negative                | MH                          |
| M15       | MH                          | Negative                | MH                          |
| M16       | NG                          | Negative                | NG                          |
| M17       | NG                          | Negative                | NG                          |
| M18       | UU, NG                      | UU                      | UU, NG                      |
| M19       | UU, MG, HSV1                | UU, MG                  | UU, MG, HSV1                |
| M20       | HSV1                        | Negative                | HSV1                        |
| M21       | UU, MH, HSV1                | UU, MH                  | UU, MH, HSV1                |
| M22       | UU, MG, MH, HSV2            | UU, MG, MH              | UU, MG, MH, HSV2            |
| M23       | HSV2                        | Negative                | HSV2                        |
| M24       | HSV1, HSV2                  | HSV1                    | HSV1, HSV2                  |
| M25       | NG, HSV2                    | NG                      | NG, HSV2                    |
| M26       | HSV2                        | Negative                | HSV2                        |
| M27       | UU, CT, MH                  | UU, CT                  | UU, CT, MH                  |
| M28       | UU                          | Negative                | UU                          |
| M29       | UU, CT, HSV1, HSV2          | CT, HSV1, HSV2          | UU, CT, HSV1, HSV2          |
| M30       | UU, CT, MH                  | UU, CT                  | UU, CT, MH                  |
| M31       | UU                          | Negative                | UU                          |

<sup>a</sup> CT, *Chlamydia trachomatis*; MG, *Mycoplasma genitalium*; NG, *Neisseria gonorrhoeae*; UU, *Ureaplasma urealyticum*; HSV1, Herpes simplex virus types 1; MH, *Mycoplasma hominis*; HSV2, Herpes simplex virus types 2;

Table S5 | Multiple infections verified by confirmatory tests and arbitration testing

| Infection type <sup>a</sup> | No. of confirmed samples |
|-----------------------------|--------------------------|
| Dual infections (n=32)      |                          |
| UU, MH                      | 5                        |
| UU, MG                      | 5                        |
| UU, CT                      | 5                        |
| UU, NG                      | 2                        |
| CT, MH                      | 2                        |
| CT, NG                      | 2                        |
| MG, MH                      | 2                        |
| TP, MH                      | 1                        |
| CT, HSV1                    | 1                        |
| CT, HSV2                    | 1                        |
| UP, MG                      | 1                        |
| UP, MH                      | 1                        |
| MG, NG                      | 1                        |
| MH, NG                      | 1                        |
| NG, HSV2                    | 1                        |
| HSV1, HSV2                  | 1                        |
| Triple infections (n=20)    |                          |
| UU, MH, CT                  | 6                        |
| UU, MG, MH                  | 3                        |
| UU, CT, HSV1                | 2                        |
| UU, MH, HSV1                | 1                        |
| UU, MG, HSV1                | 1                        |
| CT, MG, NG                  | 1                        |
| CT, MH, NG                  | 1                        |
| MG, MH, NG                  | 1                        |
| MG, NG, HSV1                | 1                        |
| MG, MH, HSV1                | 1                        |
| MG, HSV1, HSV2              | 1                        |
| NG, HSV1, HSV2              | 1                        |
| Quadruple infections (n=9)  |                          |
| UU, CT, MH, NG              | 4                        |
| UU, CT, MG, NG              | 1                        |
| UU, MG, MH, HSV2            | 1                        |
| UU, MG, MH, NG              | 1                        |
| UU, NG, HSV1, HSV2          | 1                        |
| CT, MG, MH, NG              | 1                        |
| Quintuple infections (n=1)  |                          |
| UU, CT, MH, HSV1, HSV2      | 1                        |

<sup>a</sup> UU, *Ureaplasma urealyticum*; MH, *Mycoplasma hominis*; MG, *Mycoplasma genitalium*; CT, *Chlamydia trachomatis*; NG, *Neisseria gonorrhoeae*; TP, *Treponema pallidum*; HSV1, Herpes simplex virus types 1; HSV2, Herpes simplex virus types 2; UP, *Ureaplasma parvum*



Figure S1

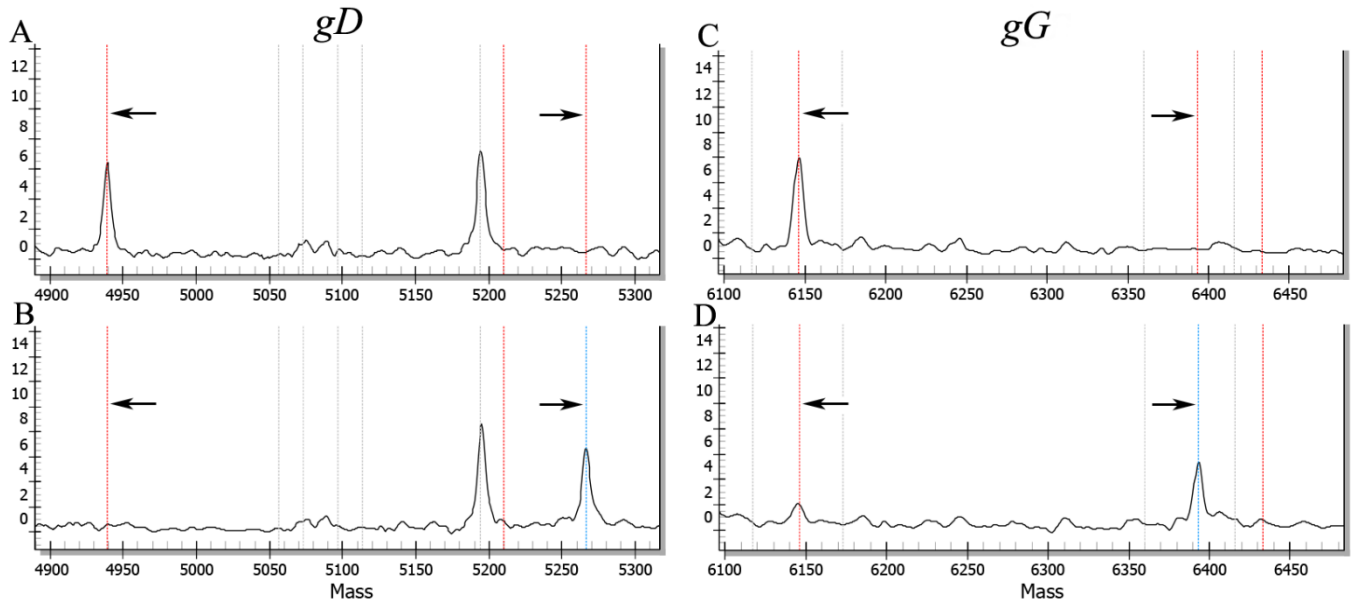

Figure S1 | Analytical specificity of Herpes simplex virus types 1 by using STI-MS assay. (A) Negative result of *gD* assay, (B) Positive result of *gD* assay, (C) Negative result of *gG* assay, (D) Positive result of *gG* assay. The left arrow and the right arrow represent the unextended probes and the extended probes of the assay, respectively. The x-axis represents the mass of extension probe and the y-axis represents the intensity.

Figure S2

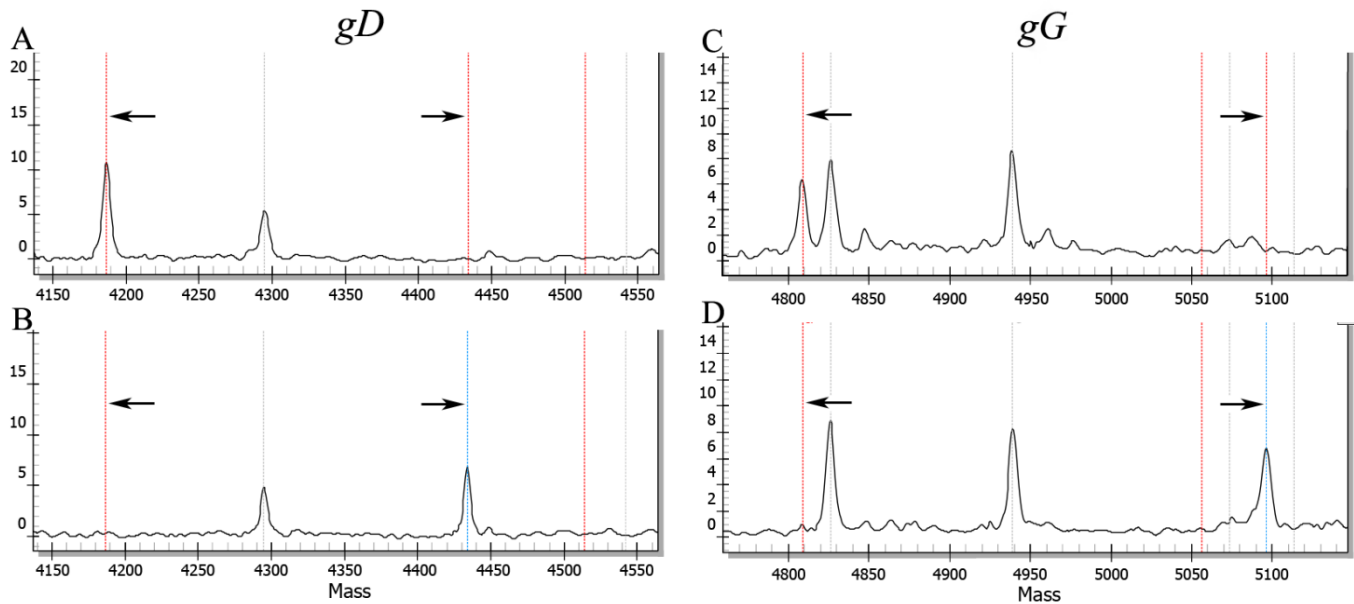

Figure S2 | Analytical specificity of Herpes simplex virus types 2 by using STI-MS assay. (A) Negative result of *gD* assay, (B) Positive result of *gD* assay, (C) Negative result of *gG* assay, (D) Positive result of *gG* assay. The left arrow and the right arrow represent the unextended probes and the extended probes of the assay, respectively. The x-axis represents the mass of extension probe and the y-axis represents the intensity.

Figure S3

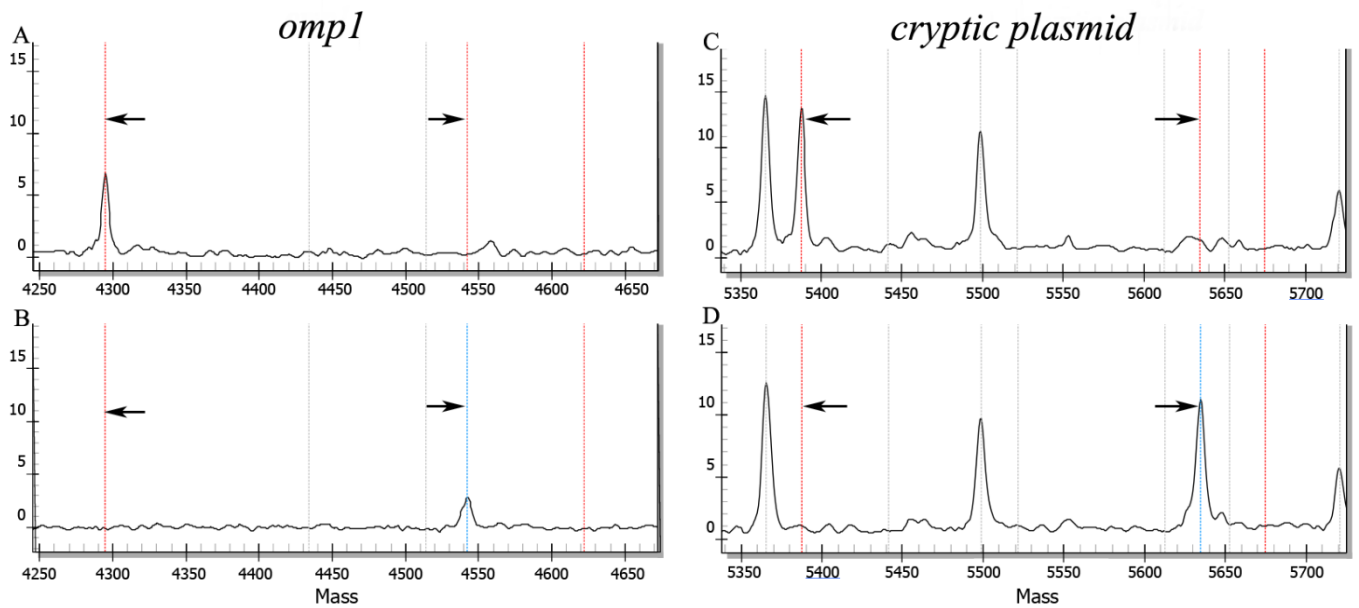

Figure S3 | Analytical specificity of *Chlamydia trachomatis* by using STI-MS assay. (A) Negative result of *omp1* assay, (B) Positive result of *omp1* assay, (C) Negative result of *cryptic plasmid* assay, (D) Positive result of *cryptic plasmid* assay. The left arrow and the right arrow represent the unextended probes and the extended probes of the assay, respectively. The x-axis represents the mass of extension probe and the y-axis represents the intensity.

Figure S4

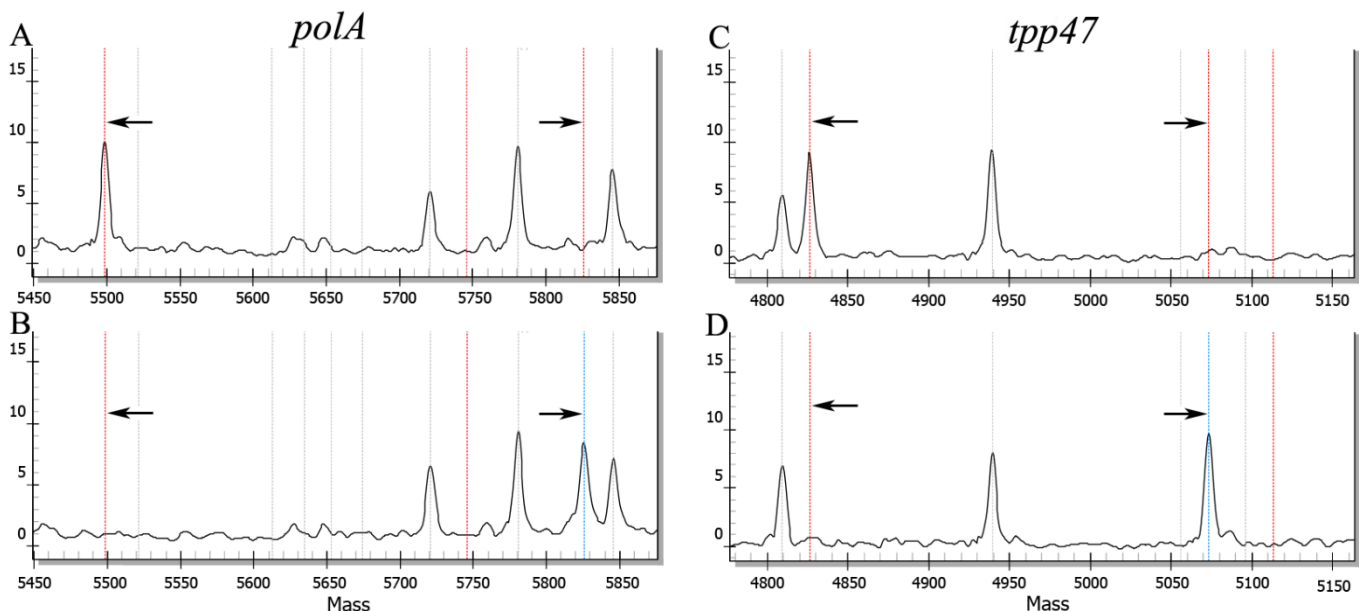

Figure S4 | Analytical specificity of *Treponema pallidum* by using STI-MS assay. (A) Negative result of *polA* assay, (B) Positive result of *polA* assay, (C) Negative result of *tpp47* assay, (D) Positive result of *tpp47* assay. The left arrow and the right arrow represent the unextended probes and the extended probes of the assay, respectively. The x-axis represents the mass of extension probe and the y-axis represents the intensity.

Figure S5

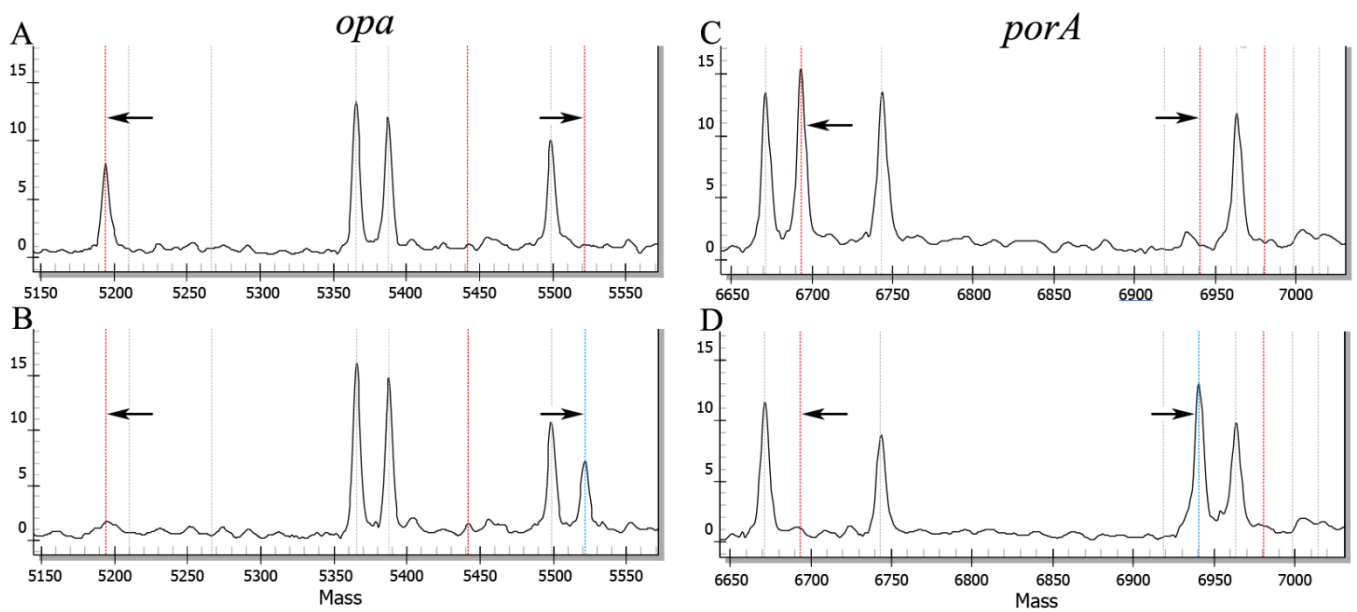

Figure S5 | Analytical specificity of *Neisseria gonorrhoeae* by using STI-MS assay. (A) Negative result of *opa* assay, (B) Positive result of *opa* assay, (C) Negative result of *porA* assay, (D) Positive result of *porA* assay. The left arrow and the right arrow represent the unextended probes and the extended probes of the assay, respectively. The x-axis represents the mass of extension probe and the y-axis represents the intensity.

Figure S6

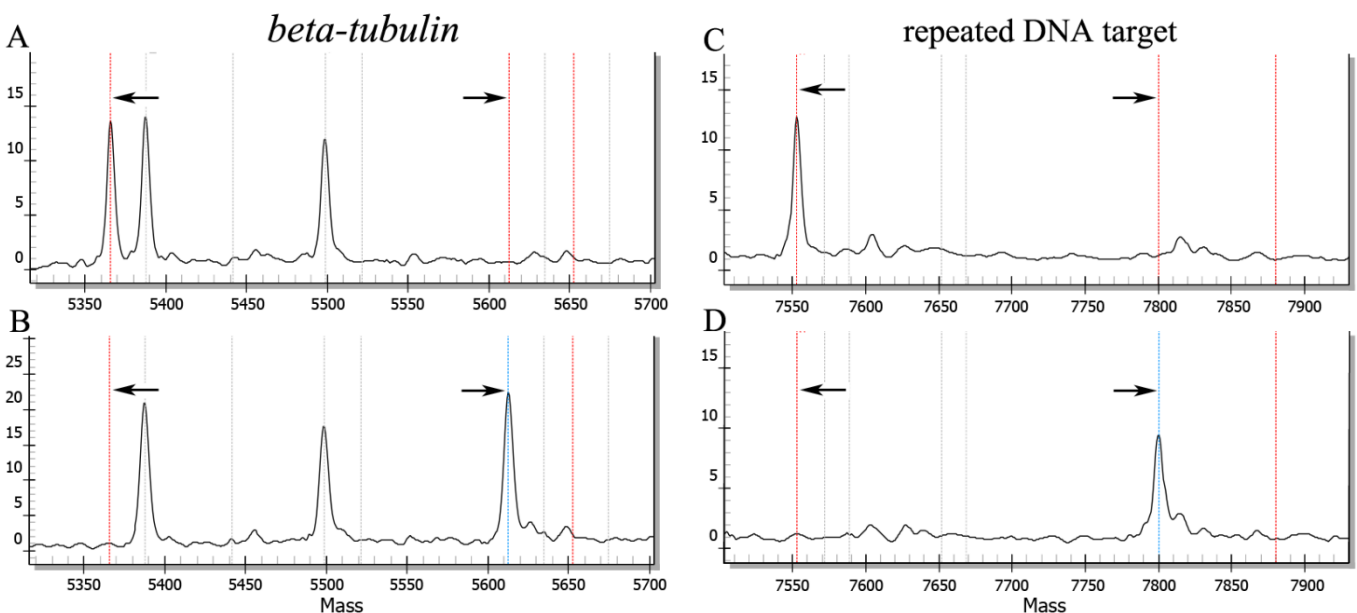

Figure S6 | Analytical specificity of *Trichomonas vaginalis* by using STI-MS assay. (A) Negative result of *beta-tubulin* assay, (B) Positive result of *beta-tubulin* assay, (C) Negative result of repeated DNA target assay, (D) Positive result of repeated DNA target assay. The left arrow and the right arrow represent the unextended probes and the extended probes of the assay, respectively. The x-axis represents the mass of extension probe and the y-axis represents the intensity.

Figure S7

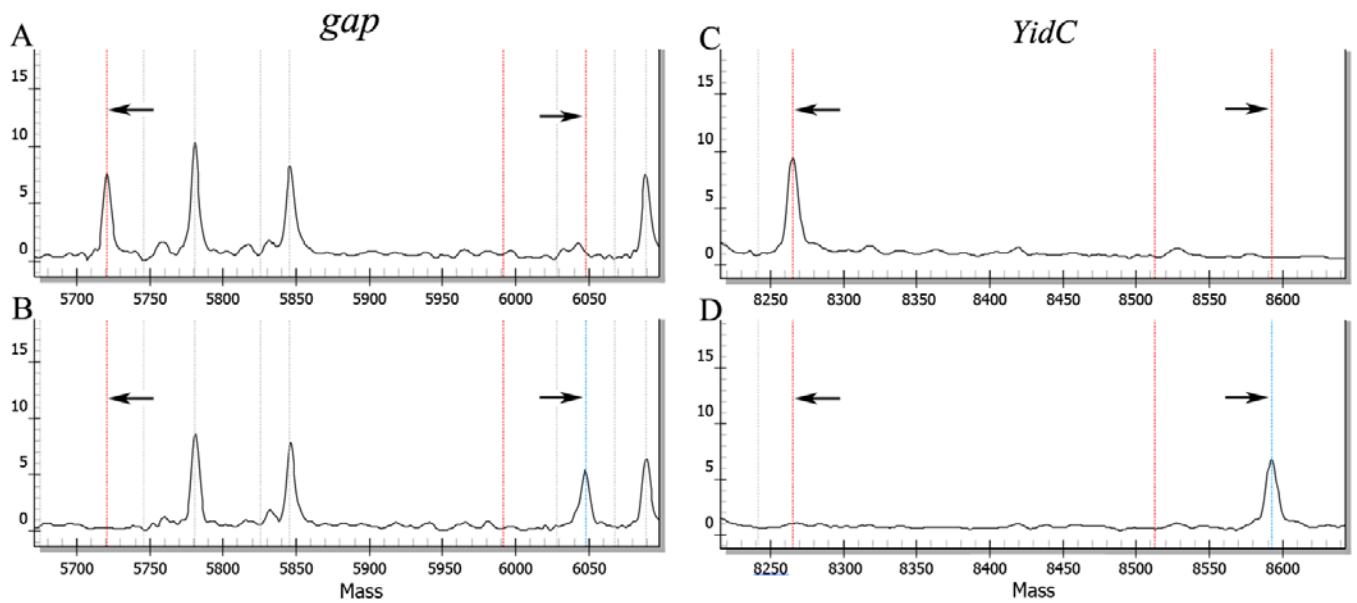

Figure S7 | Analytical specificity of *Mycoplasma hominis* by using STI-MS assay. (A) Negative result of *gap* assay, (B) Positive result of *gap* assay, (C) Negative result of *YidC* assay, (D) Positive result of *YidC* assay. The left arrow and the right arrow represent the unextended probes and the extended probes of the assay, respectively. The x-axis represents the mass of extension probe and the y-axis represents the intensity.

Figure S8

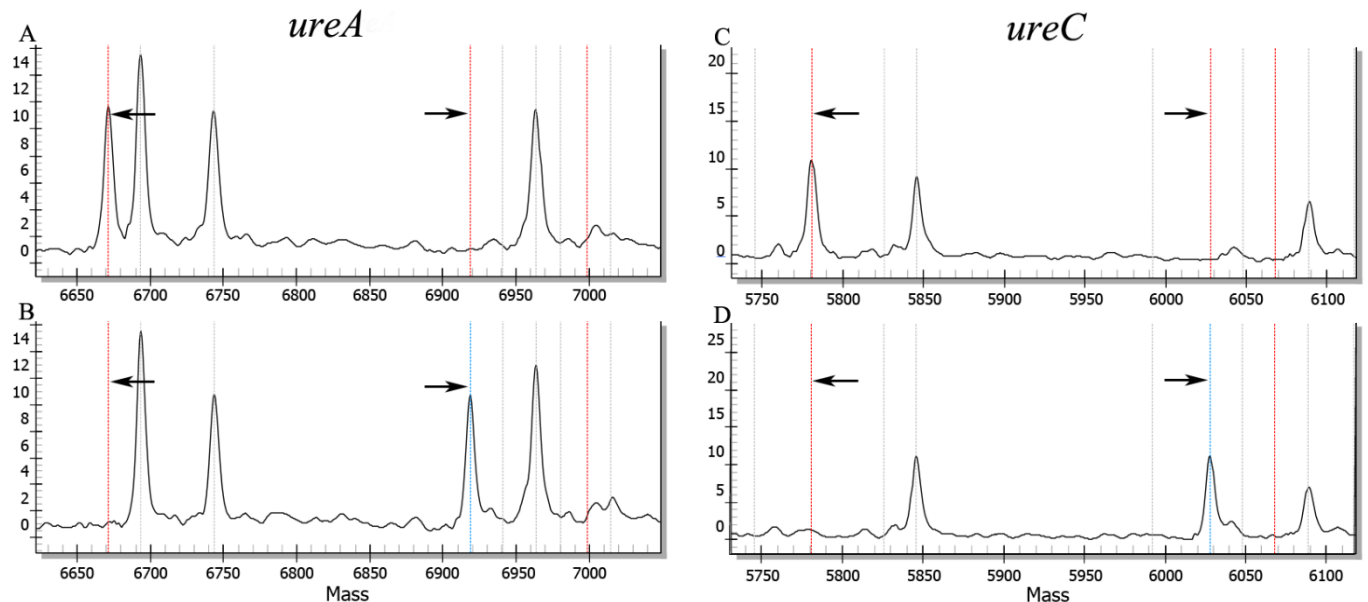

Figure S8 | Analytical specificity of *Ureaplasma urealyticum* by using STI-MS assay. (A) Negative result of *ureA* assay, (B) Positive result of *ureA* assay, (C) Negative result of *ureC* assay, (D) Positive result of *ureC* assay. The left arrow and the right arrow represent the unextended probes and the extended probes of the assay, respectively. The x-axis represents the mass of extension probe and the y-axis represents the intensity.

Figure S9

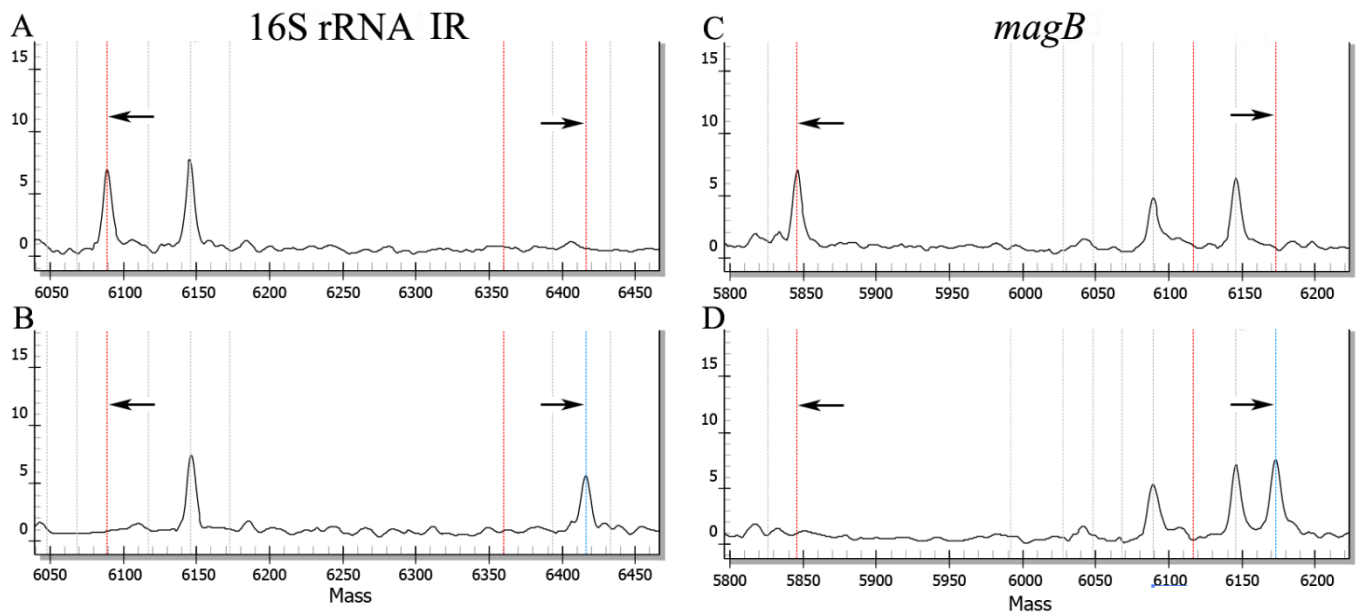

Figure S9 | Analytical specificity of *Mycoplasma genitalium* by using STI-MS assay. (A) Negative result of 16S rRNA IR assay, (B) Positive result of 16S rRNA IR assay, (C) Negative result of *magB* assay, (D) Positive result of *magB* assay. The left arrow and the right arrow represent the unextended probes and the extended probes of the assay, respectively. The x-axis represents the mass of extension probe and the y-axis represents the intensity.

Figure S10

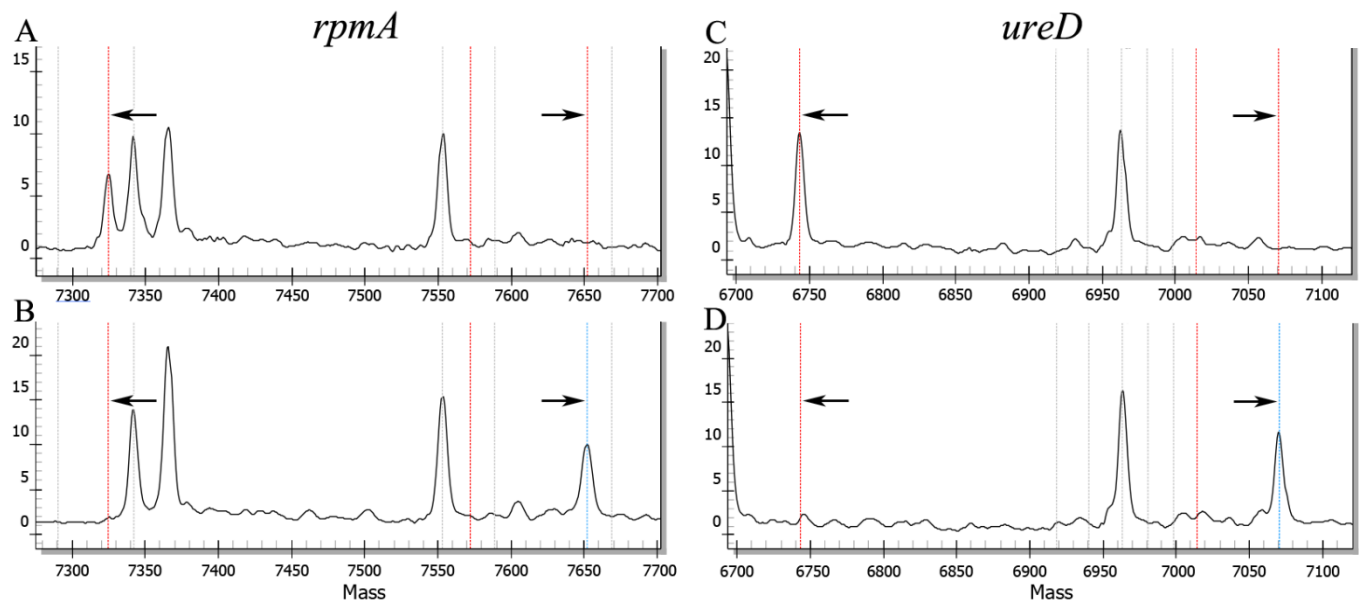

Figure S10 | Analytical specificity of *Ureaplasma parvum* by using STI-MS assay. (A) Negative result of *rpmA* assay, (B) Positive result of *rpmA* assay, (C) Negative result of *ureD* assay, (D) Positive result of *ureD* assay. The left arrow and the right arrow represent the unextended probes and the extended probes of the assay, respectively. The x-axis represents the mass of extension probe and the y-axis represents the intensity.

Figure S11

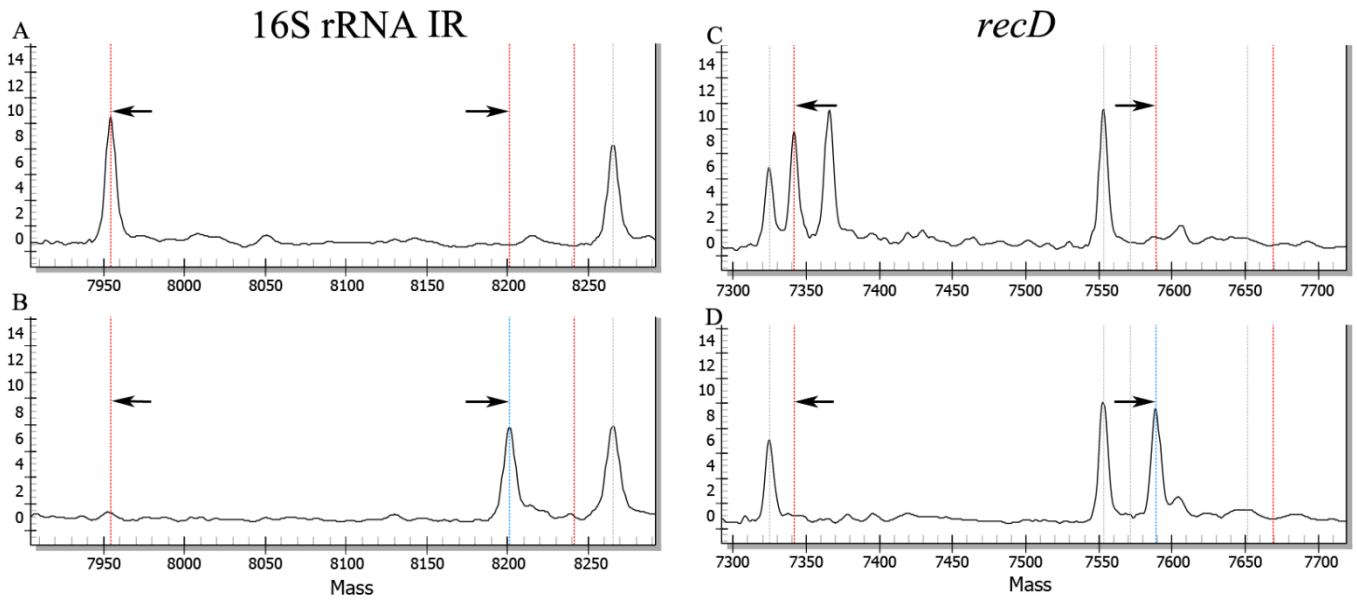

Figure S11 | Analytical specificity of *Haemophilus ducreyi* by using STI-MS assay. (A) Negative result of 16S rRNA IR assay, (B) Positive result of 16S rRNA IR assay, (C) Negative result of *recD* assay, (D) Positive result of *recD* assay. The left arrow and the right arrow represent the unextended probes and the extended probes of the assay, respectively. The x-axis represents the mass of extension probe and the y-axis represents the intensity.

Figure S12

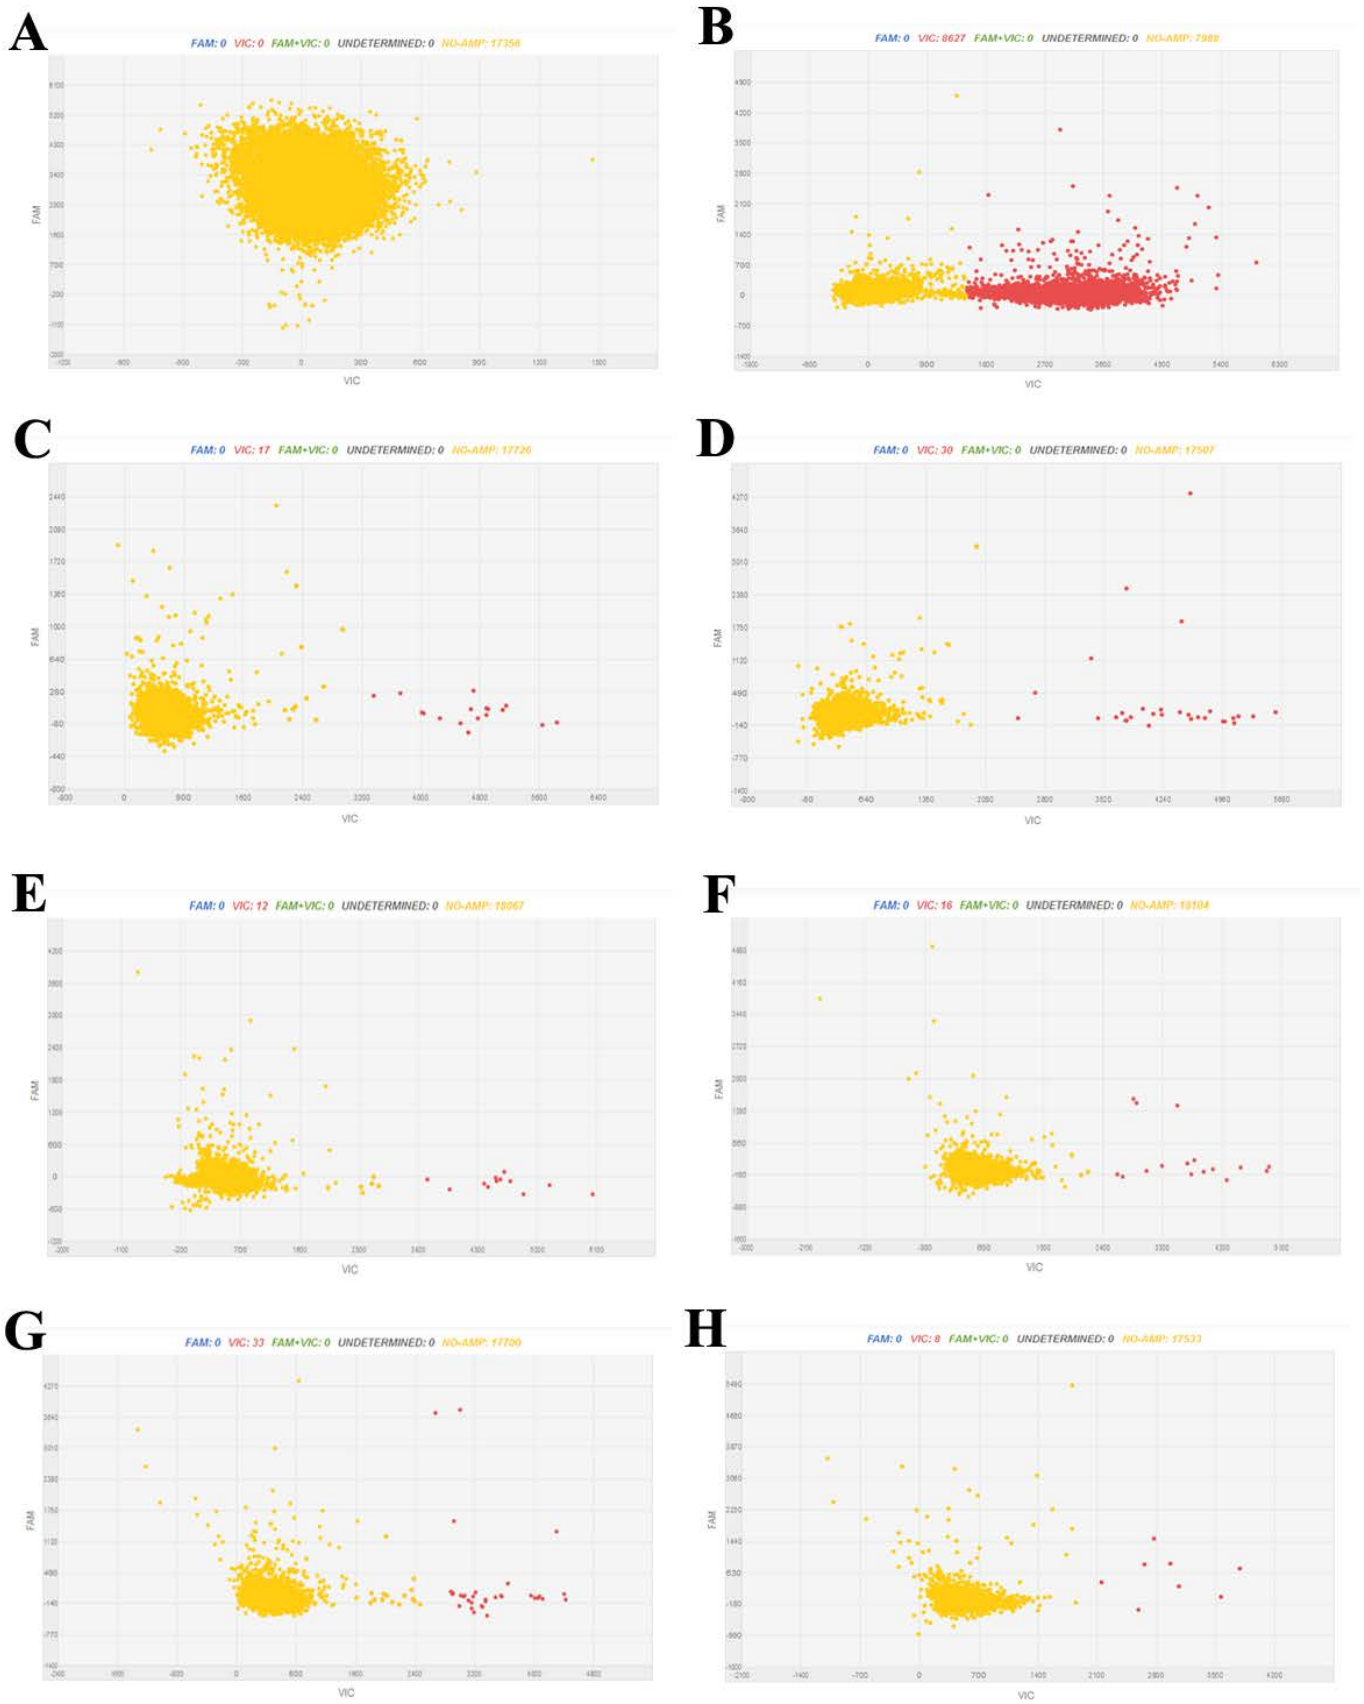

Figure S12 | Discrepant results of *Chlamydia trachomatis* verified by Digital PCR. Figure (A), (B), (C), (D), (E), (F), (G) and (H) represent the results of negative control, positive control, sample M1, sample M2, sample M3, sample M4, sample M5 and sample M6, respectively. The used probe was labeled by fluorescent VIC at the 5' end.

Figure S13

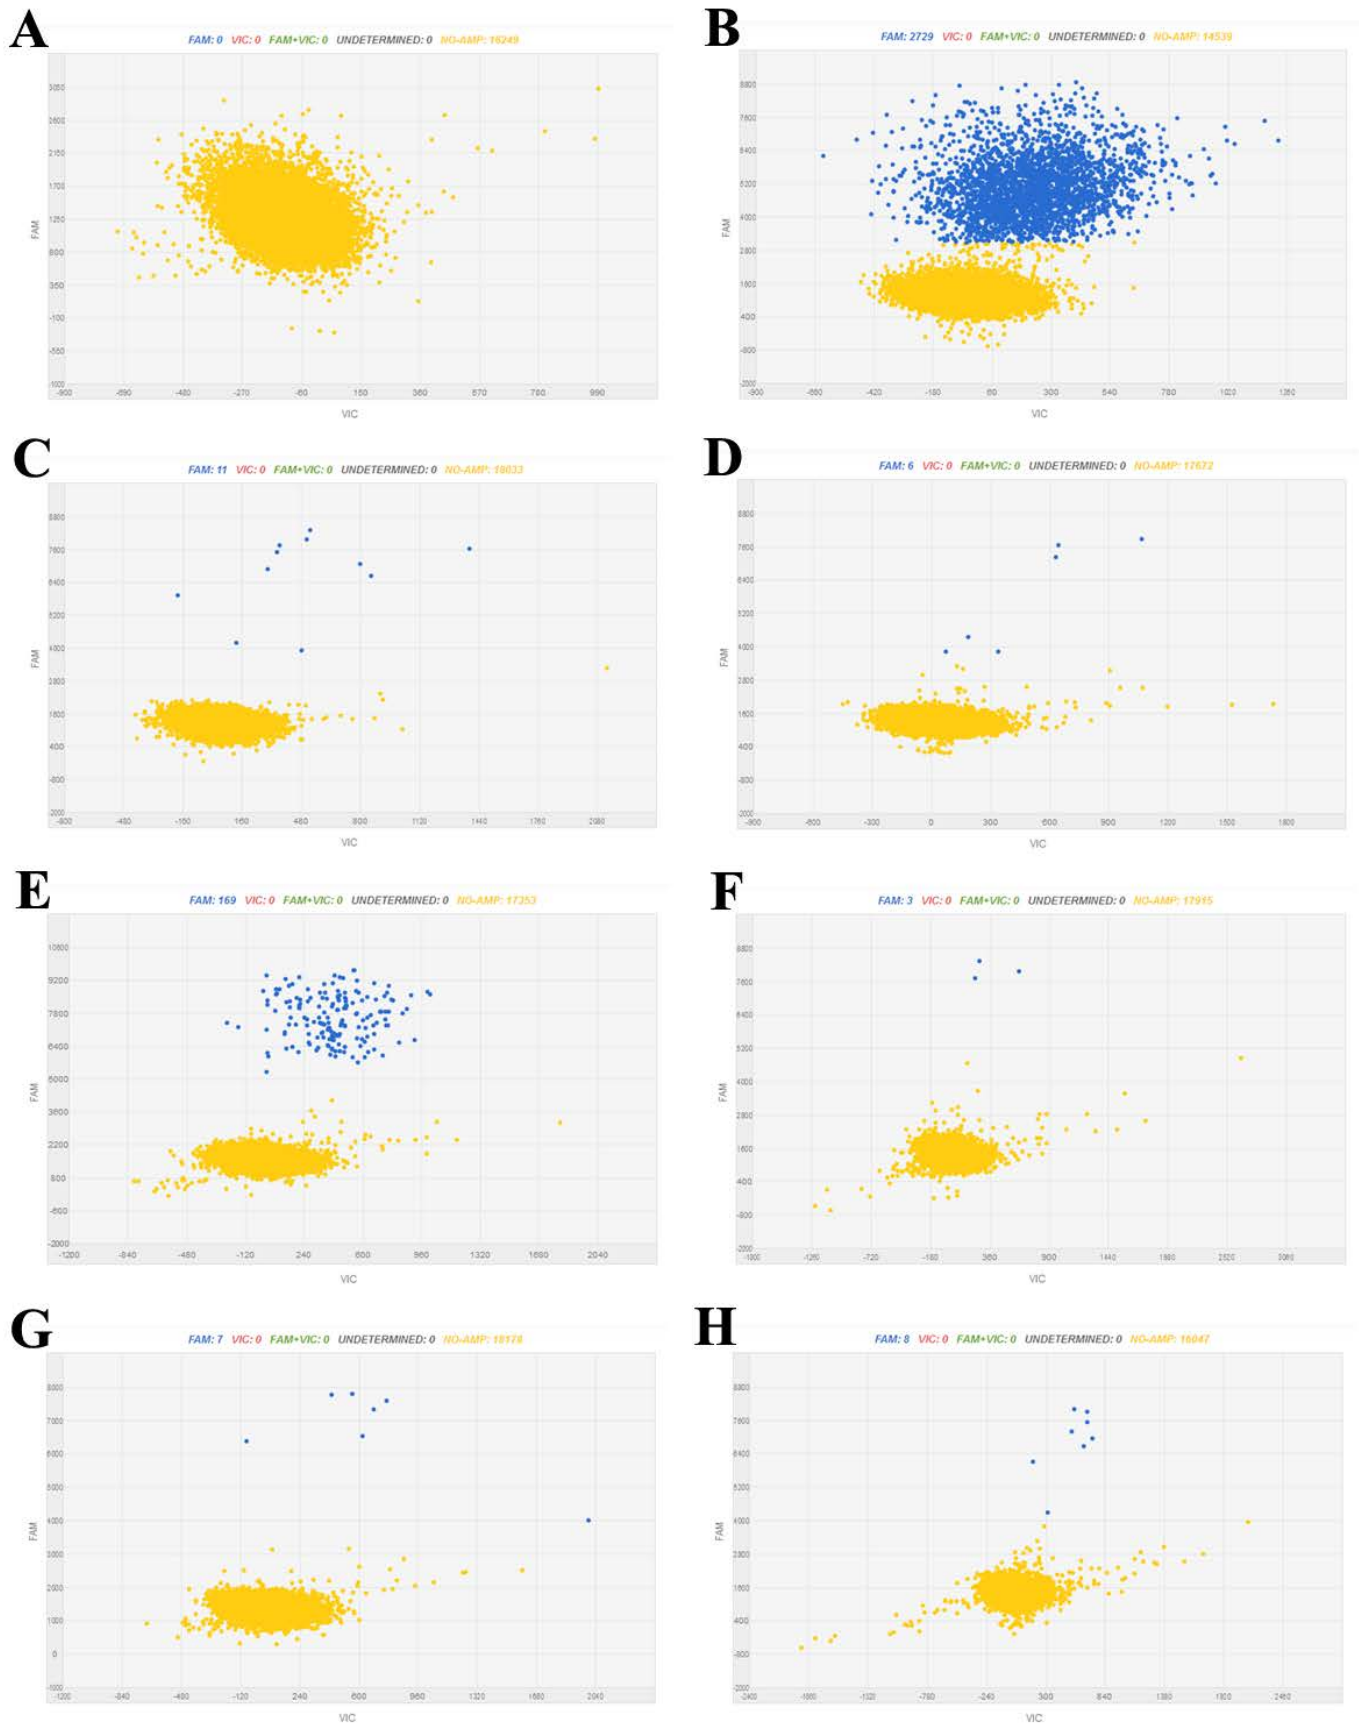

Figure S13 | Discrepant results of *Mycoplasma genitalium* verified by Digital PCR. Figure (A), (B), (C), (D), (E), (F), (G) and (H) represent the results of negative control, positive control, sample M7, sample M8, sample M9, sample M10, sample M11 and sample M12, respectively. The used probe was labeled by fluorescent FAM at the 5' end.



Figure S14

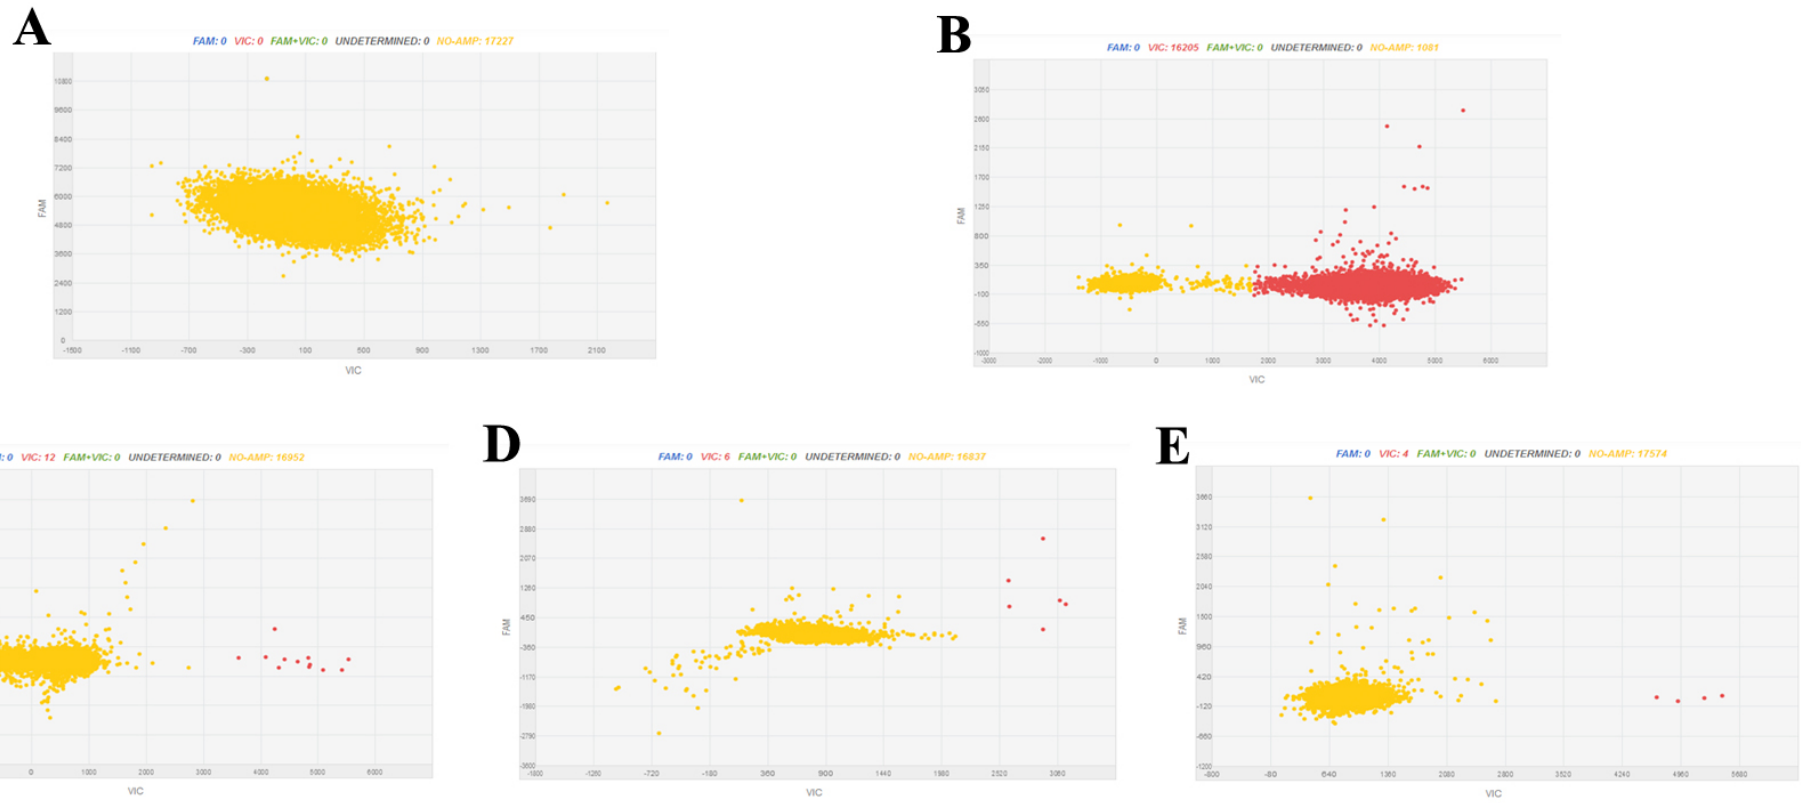

Figure S14 | Discrepant results of *Mycoplasma hominis* verified by Digital PCR. Figure (A), (B), (C), (D) and (E) represent the results of negative control, positive control, sample M13, sample M14, and sample M15, respectively. The used probe was labeled by fluorescent VIC at the 5' end.

Figure S15

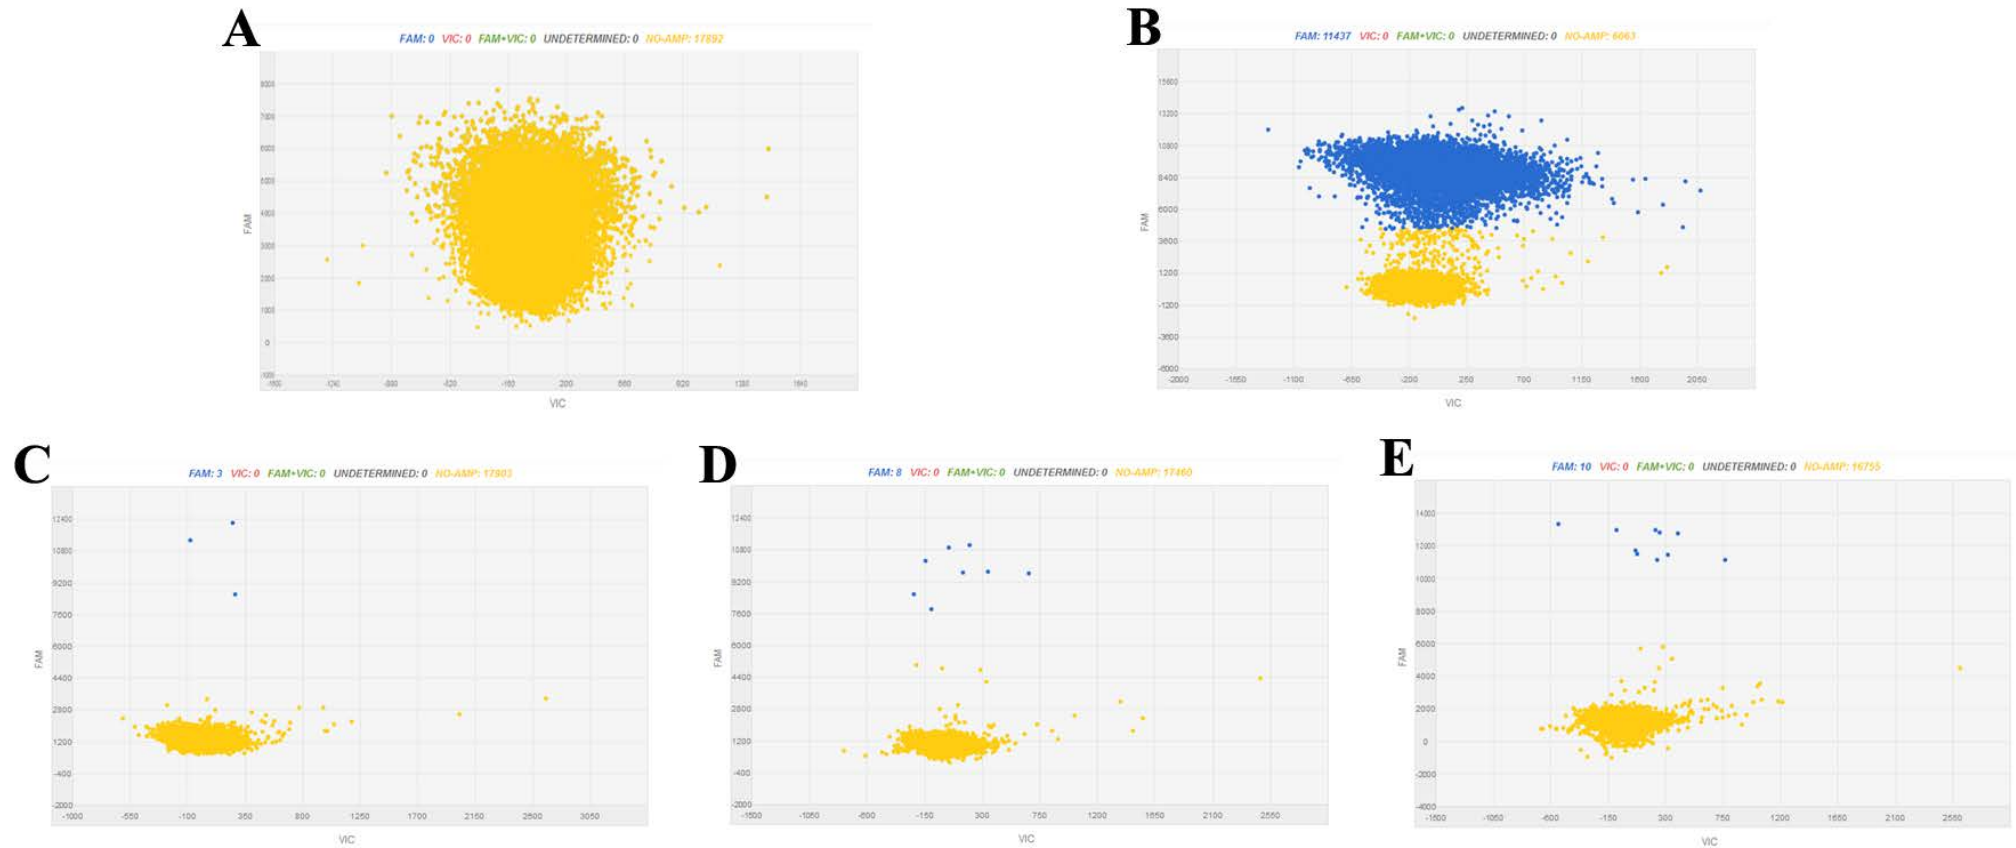

Figure S15 | Discrepant results of *Neisseria gonorrhoeae* verified by Digital PCR. Figure (A), (B), (C), (D) and (E) represent the results of negative control, positive control, sample M16, sample M17, and sample M18, respectively. The used probe was labeled by fluorescent FAM at the 5' end.

Figure S16

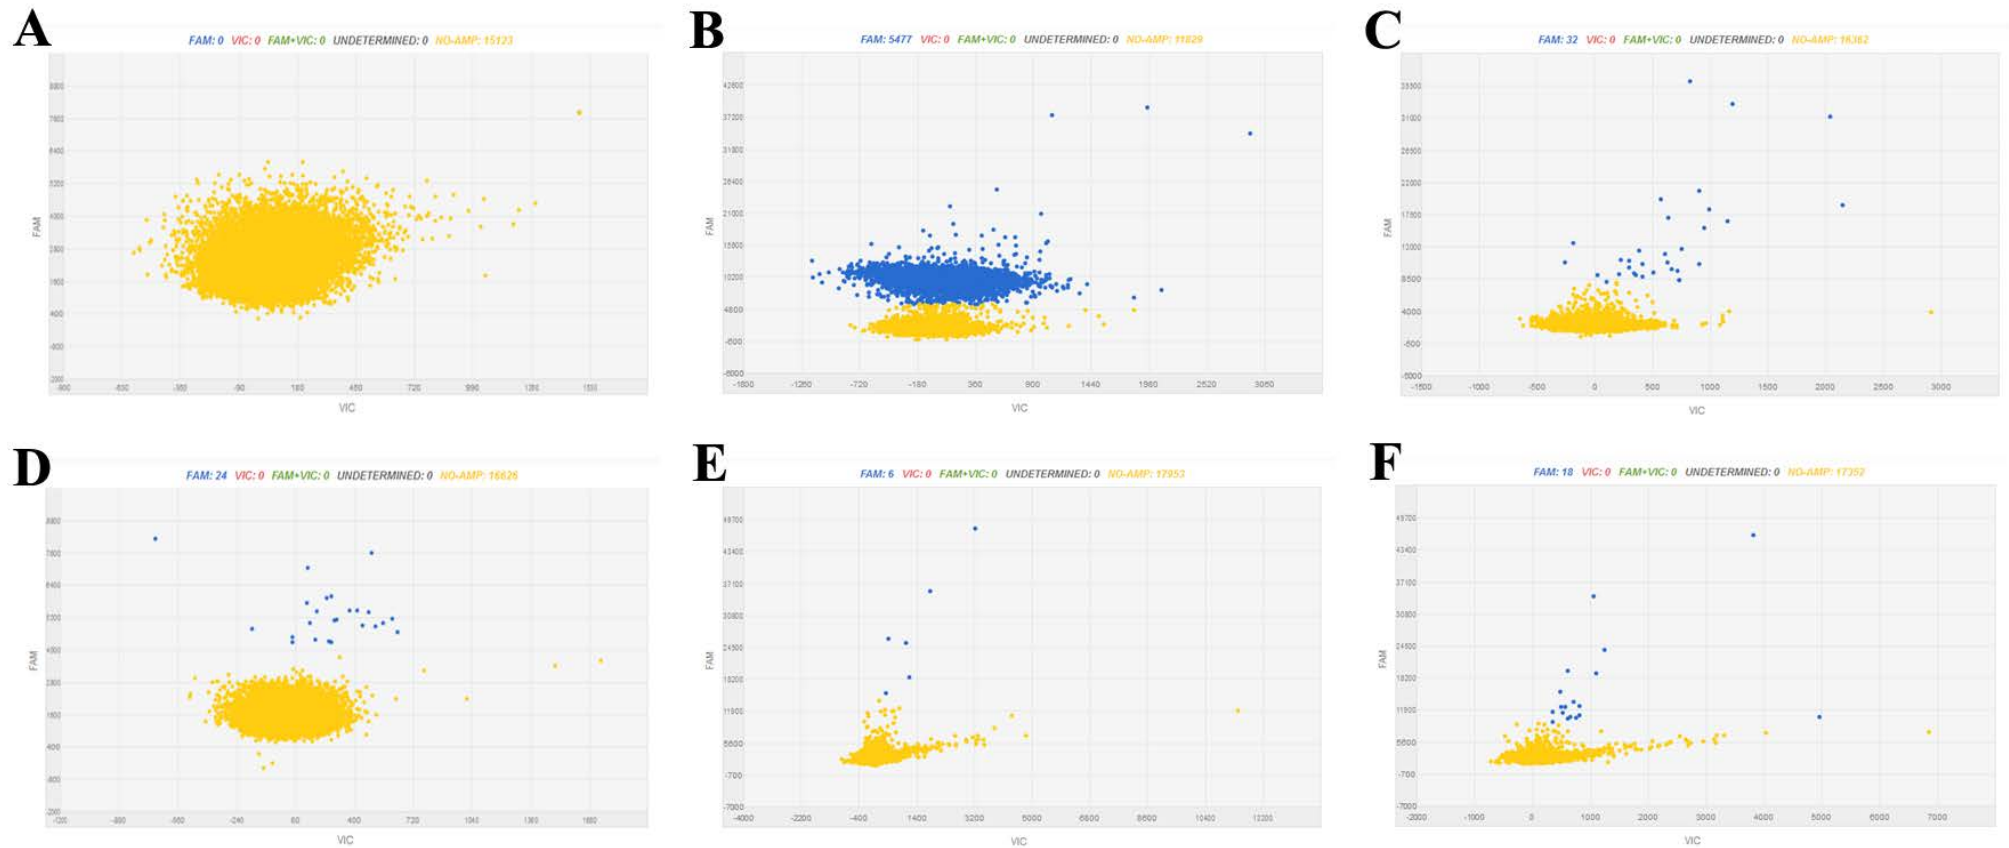

Figure S16 | Discrepant results of Herpes simplex virus types 1 verified by Digital PCR. Figure (A), (B), (C), (D), (E) and (F) represent the results of negative control, positive control, sample M4, sample M19, sample M20, and sample M21, respectively. The used probe was labeled by fluorescent FAM at the 5' end.

Figure S17

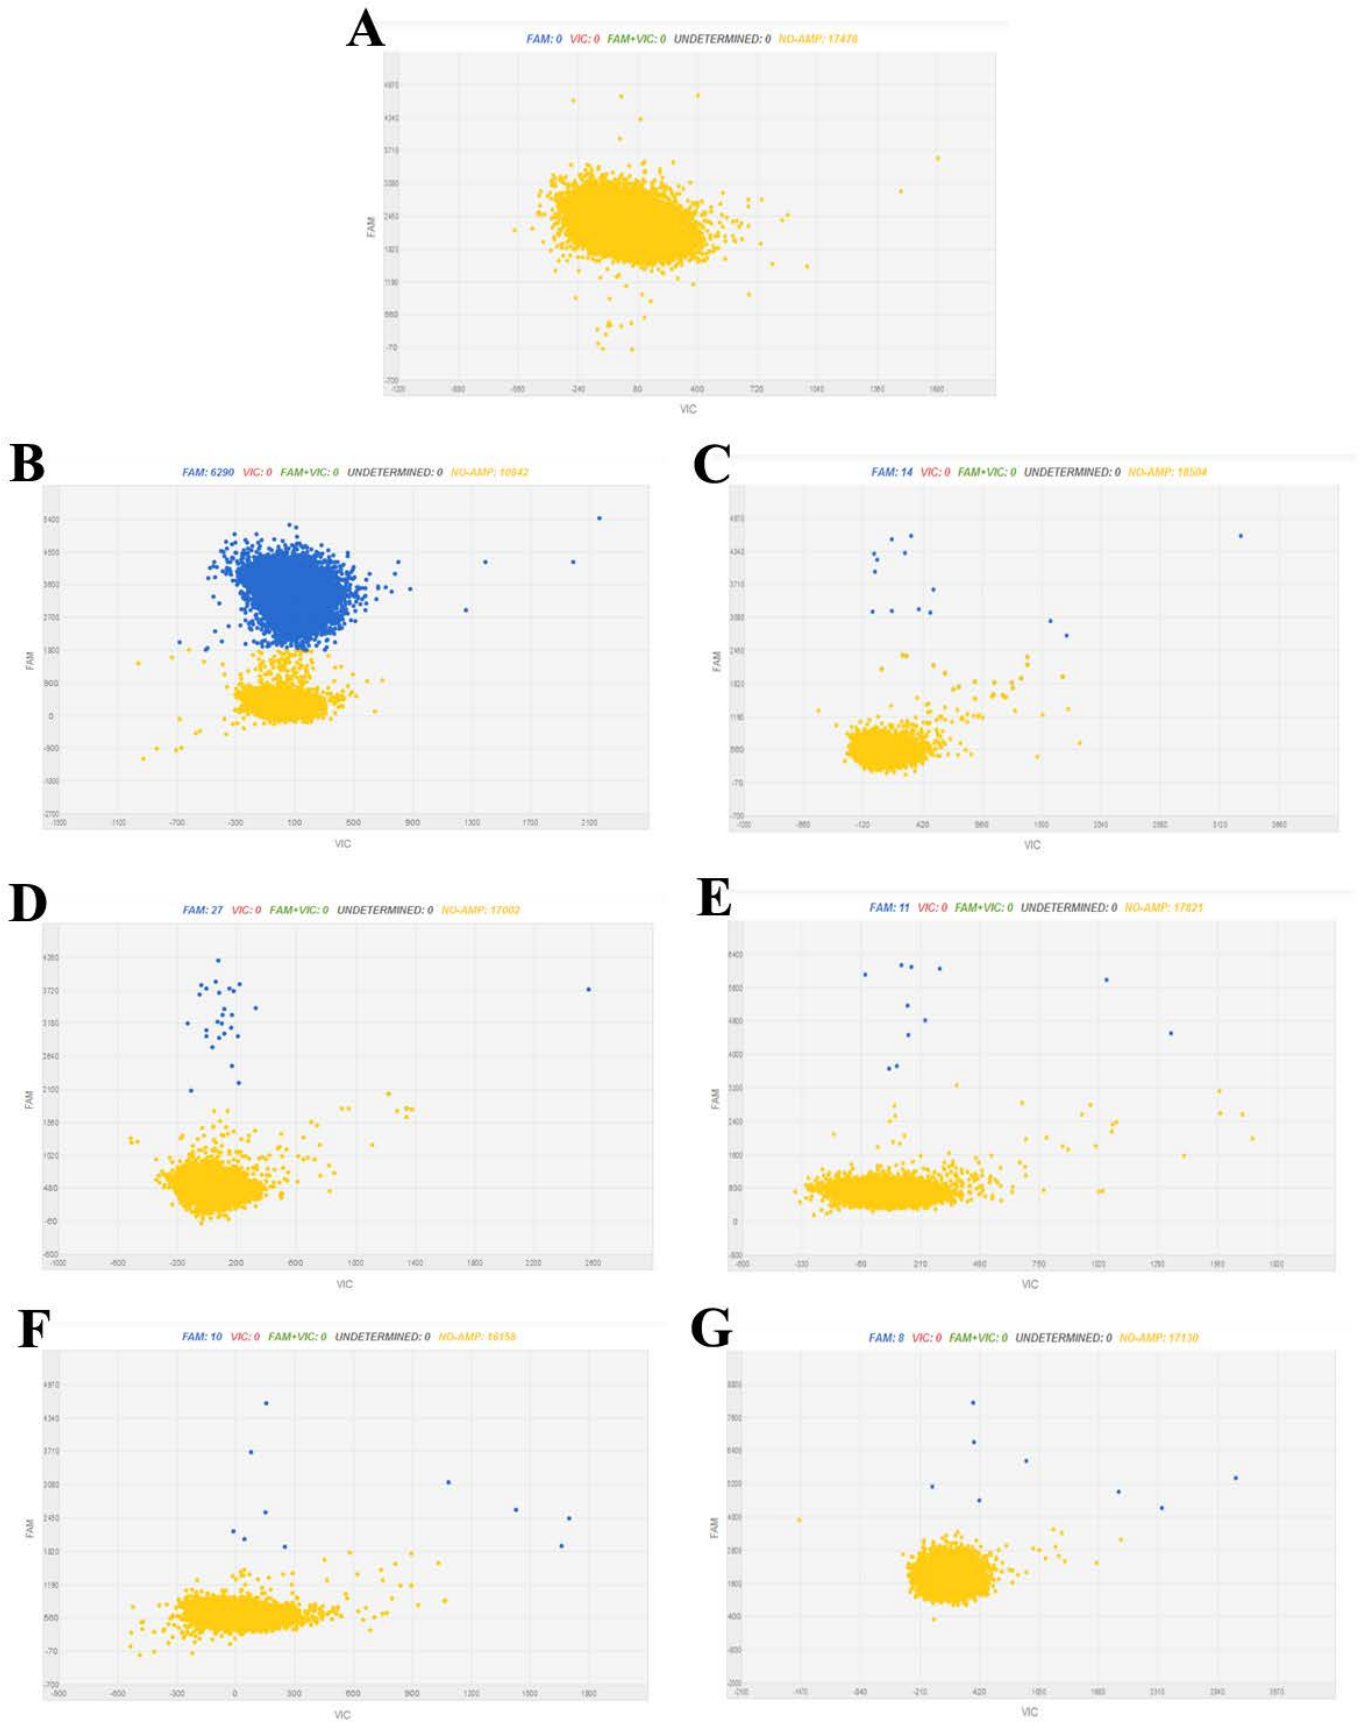

Figure S17 | Discrepant results of Herpes simplex virus types 2 verified by Digital PCR. Figure (A), (B), (C), (D), (E), (F) and (G) represent the results of negative control, positive control, sample M22, sample M23, sample M24, sample M25 and sample M26, respectively. The used probe was labeled by fluorescent FAM at the 5' end.

Figure S18

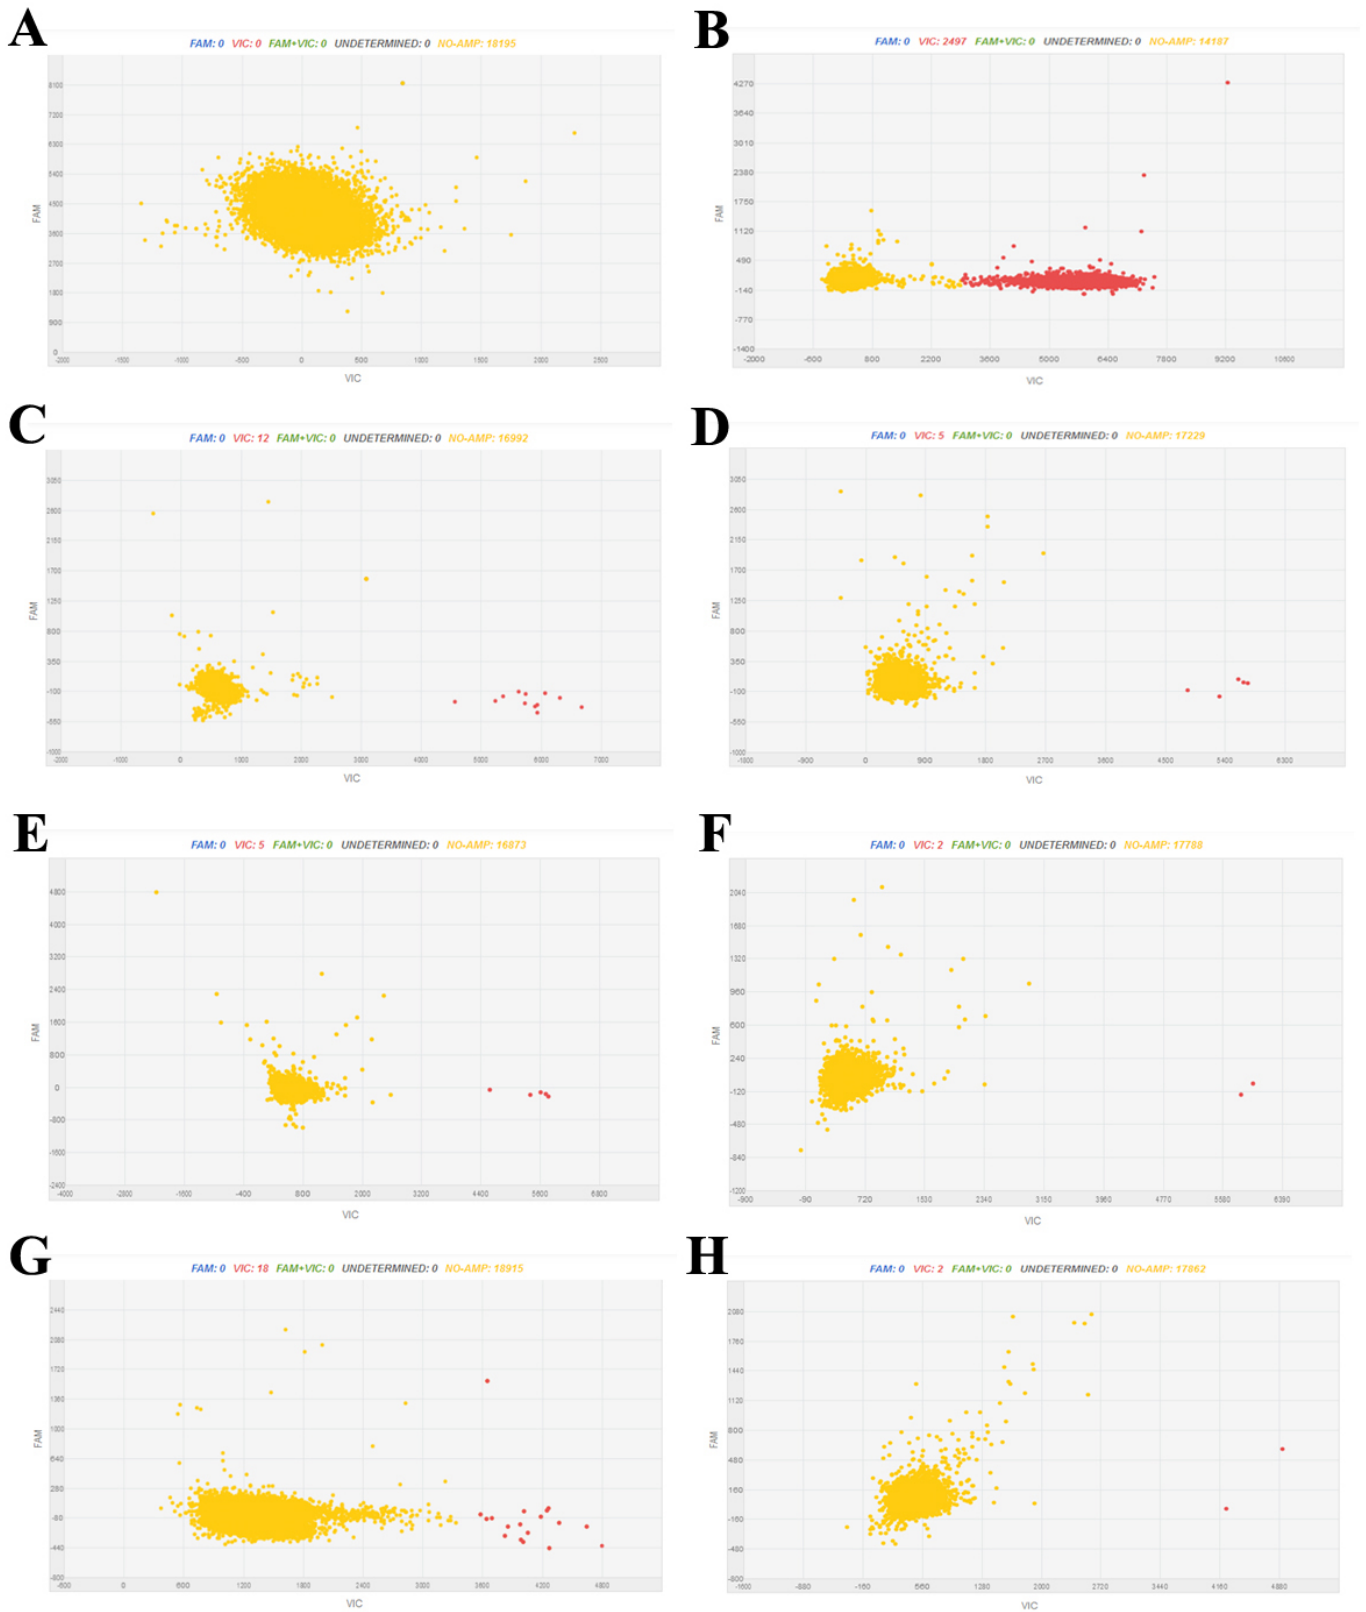

Figure S18 | Discrepant results of *Ureaplasma urealyticum* verified by Digital PCR. Figure (A), (B), (C), (D), (E), (F), (G) and (H) represent the results of negative control, positive control, sample M9, sample M27, sample M28, sample M29, sample M30 and sample M31, respectively. The used probe was labeled by fluorescent VIC at the 5' end.

## References

1. Mahony JB, Jang D, Chong S, et al. Detection of Chlamydia trachomatis, Neisseria gonorrhoeae, Ureaplasma urealyticum, and Mycoplasma genitalium in First-void Urine Specimens by Multiplex Polymerase Chain Reaction. *Mol Diagn.* 1997;2(3):161-168.
2. Leslie DE, Azzato F, Karapanagiotidis T, Leydon J, Fyfe J. Development of a real-time PCR assay to detect Treponema pallidum in clinical specimens and assessment of the assay's performance by comparison with serological testing. *J Clin Microbiol.* 2007;45(1):93-96.
3. Hjelmevoll SO, Olsen ME, Sollid JU, Haaheim H, Unemo M, Skogen V. A fast real-time polymerase chain reaction method for sensitive and specific detection of the Neisseria gonorrhoeae porA pseudogene. *J Mol Diagn.* 2006;8(5):574-581.
4. Vancutsem E, Soetens O, Breugelmans M, Foulon W, Naessens A. Modified real-time PCR for detecting, differentiating, and quantifying Ureaplasma urealyticum and Ureaplasma parvum. *J Mol Diagn.* 2011;13(2):206-212.
5. Jensen JS, Bjornelius E, Dohn B, Lidbrink P. Use of TaqMan 5' nuclease real-time PCR for quantitative detection of Mycoplasma genitalium DNA in males with and without urethritis who were attendees at a sexually transmitted disease clinic. *J Clin Microbiol.* 2004;42(2):683-692.
6. Sviben M, Missoni EM, Mestrovic T, Vojnovic G, Galinovic GM. Epidemiology and laboratory characteristics of Trichomonas vaginalis infection in Croatian men with and without urethritis syndrome: a case-control study. *Sex Transm Infect.* 2015;91(5):360-364.
7. Glatz M, Juricevic N, Altwegg M, et al. A multicenter prospective trial to assess a new real-time polymerase chain reaction for detection of Treponema pallidum, herpes simplex-1/2 and Haemophilus ducreyi in genital, anal and oropharyngeal ulcers. *Clin Microbiol Infect.* 2014;20(12):O1020-1027.
8. Kessler HH, Muhlbauer G, Rinner B, et al. Detection of Herpes simplex virus DNA by real-time PCR. *J Clin Microbiol.* 2000;38(7):2638-2642.
9. Nicoll S, Brass A, Cubie HA. Detection of herpes viruses in clinical samples using real-time PCR. *J Virol Methods.* 2001;96(1):25-31.
10. Jensen JS, Borre MB, Dohn B. Detection of Mycoplasma genitalium by PCR amplification of the 16S rRNA gene. *J Clin Microbiol.* 2003;41(1):261-266.
